# Supplementary material for: Synergetic Improvement of Stability and Conductivity of Hybrid Composites formed by PEDOT:PSS and SnO Nanoparticles
Source: PubMed Central journal article supplement (PMC7036770; doi:10.3390/molecules25030695), 2020-02-06
Supplement: molecules-25-00695-s001.pdf [file molecules-25-00695-s001.pdf]

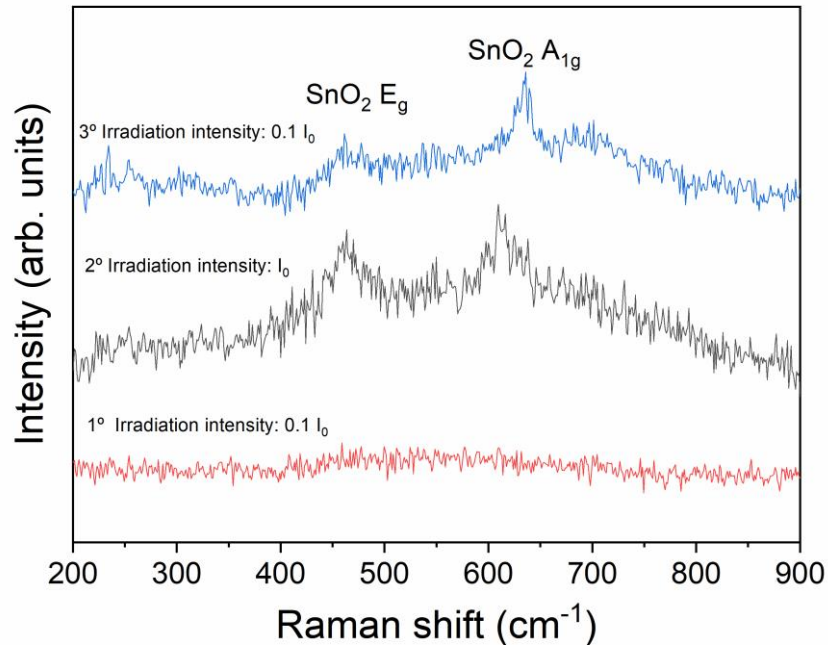

**Figure S1.** Raman spectra of the laser-induced transition from SnO to SnO<sub>2</sub>. Initially, no modes corresponding to SnO<sub>2</sub> are observed with a laser power of 0.1  $I_0$ . Using a power density corresponding to  $I_0$ , SnO<sub>2</sub> modes E<sub>g</sub> and A<sub>1g</sub> are detected. This transition is not reversible, as SnO<sub>2</sub> modes remain after subsequent irradiation with the lower laser power 0.1  $I_0$ .

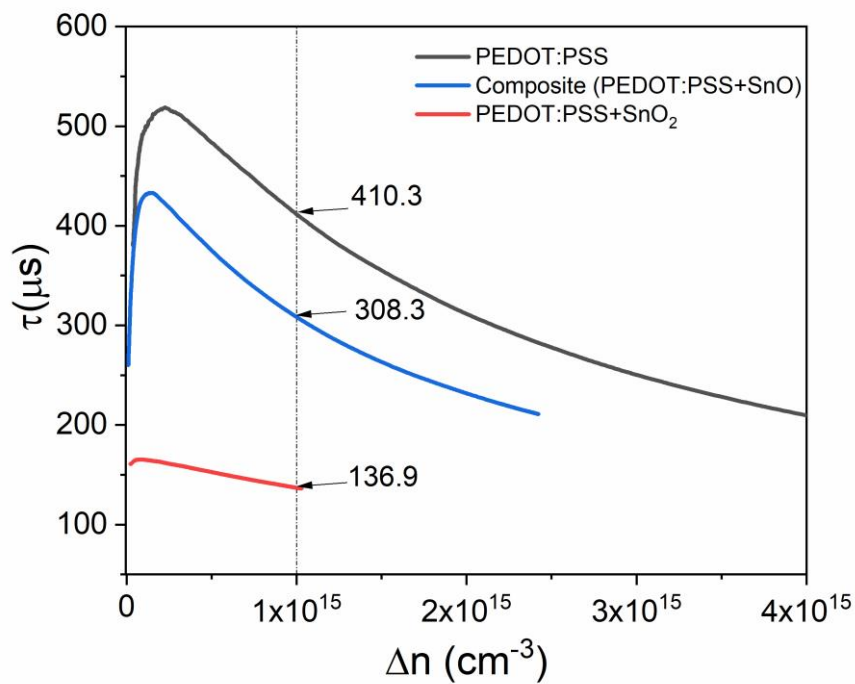

**Figure S2.** QSS-PC measurements corresponding to the samples shown in Figure 6.
